# Supplementary material for: Revisiting an Expression Dataset of Discordant Inflammatory Bowel Disease Twin Pairs Using a Mutation Burden Test Reveals CYP2C18 as a Novel Marker
Source: Front Genet. 2021 Jun 15;12:680125. doi: 10.3389/fgene.2021.680125 (PMC8239360; doi:10.3389/fgene.2021.680125)
Supplement: Supplementary Table 1 — The enriched human phenotypes and disorders related to the fine-mapped genes. [file Table_1.XLSX]

## Sheet: Gene
MMEL1
IL23R
PTPN22
AP4B1
ADAM15
EFNA1
ITLN1
FCGR2A
FCGR2B
IFIH1
SP140
ATG16L1
MST1
BSN
APEH
MST1R
SEMA3F
COL7A1
TMEM89
CDHR4
IP6K2
IFRD2
RBM6
AMT
GPX1
ARIH2
CCDC71
DAG1
BANK1
ERAP2
IRGM
TRAF3IP2
REV3L
SNAPC4
CARD9
SEC16A
MAP3K8
CUL2
CD6
NXPE1
CXCR5
LACC1
GPR65
SMAD3
TNP2
IL27
SH2B1
NOD2
ZPBP2
IKZF3
TYK2
KEAP1
FUT2

## Sheet: HPO
RANK	ID	Name	pValue	FDR B&H	FDR B&Y	Bonferroni	Genes from Input	Genes in Annotation
1	HP:0003346	Abnormal immunological laboratory finding	7.113e-14	1.369e-10	1.115e-09	1.369e-10	17	330
2	HP:0002583	Colitis	1.447e-12	9.283e-10	7.556e-09	2.785e-09	12	130
3	HP:0100281	Chronic colitis	1.447e-12	9.283e-10	7.556e-09	2.785e-09	12	130
4	HP:0001370	Rheumatoid arthritis	1.971e-12	9.484e-10	7.72e-09	3.794e-09	13	174
5	HP:0010702	Increased circulating antibody level	6.146e-12	2.366e-09	1.926e-08	1.183e-08	13	190
6	HP:0002037	Inflammation of the large intestine	1.045e-11	3.352e-09	2.728e-08	2.011e-08	13	198
7	HP:0004386	Gastrointestinal inflammation	1.936e-11	5.323e-09	4.333e-08	3.726e-08	14	261
8	HP:0003496	Increased circulating IgM level	2.965e-11	7.135e-09	5.808e-08	5.708e-08	9	63
9	HP:0002608	Celiac disease	4.909e-11	8.217e-09	6.689e-08	9.449e-08	10	96
10	HP:0100032	Immunoglobulin abnormality	5.288e-11	8.217e-09	6.689e-08	1.018e-07	14	281
11	HP:0010701	Abnormal immunoglobulin level	5.288e-11	8.217e-09	6.689e-08	1.018e-07	14	281
12	HP:0002960	Autoimmunity	5.38e-11	8.217e-09	6.689e-08	1.036e-07	18	580
13	HP:0005372	Abnormality of B cell physiology	5.549e-11	8.217e-09	6.689e-08	1.068e-07	14	282
14	HP:0002852	Hyperglobulinemia	3.94e-10	5.056e-08	4.116e-07	7.584e-07	10	118
15	HP:0004435	Hypergammaglobulinemia	3.94e-10	5.056e-08	4.116e-07	7.584e-07	10	118
16	HP:0002958	Immune dysregulation	4.286e-10	5.157e-08	4.198e-07	8.251e-07	9	84
17	HP:0002720	Decreased circulating IgA level	9.836e-10	1.114e-07	9.067e-07	1.894e-06	9	92
18	HP:0001369	Arthritis	1.267e-09	1.346e-07	1.096e-06	2.439e-06	14	356
19	HP:0011895	Anemia due to reduced life span of red cells	1.398e-09	1.346e-07	1.096e-06	2.692e-06	12	232
20	HP:0001878	Hemolytic anemia	1.398e-09	1.346e-07	1.096e-06	2.692e-06	12	232
21	HP:0012649	Increased inflammatory response	1.599e-09	1.399e-07	1.139e-06	3.079e-06	22	1202
22	HP:0012647	Abnormal inflammatory response	1.599e-09	1.399e-07	1.139e-06	3.079e-06	22	1202
23	HP:0006783	Posterior pharyngeal cleft	2.079e-09	1.74e-07	1.416e-06	4.001e-06	7	42
24	HP:0005357	Defective B cell differentiation	2.474e-09	1.984e-07	1.615e-06	4.762e-06	7	43
25	HP:0005384	Defective B cell activation	2.93e-09	2.17e-07	1.766e-06	5.641e-06	7	44
26	HP:0005432	Transient hypogammaglobulinemia of infancy	2.93e-09	2.17e-07	1.766e-06	5.641e-06	7	44
27	HP:0005368	Abnormality of humoral immunity	3.333e-09	2.376e-07	1.934e-06	6.415e-06	14	383
28	HP:0002961	Dysgammaglobulinemia	3.457e-09	2.377e-07	1.935e-06	6.655e-06	7	45
29	HP:0002846	Abnormal B cell morphology	4.089e-09	2.715e-07	2.21e-06	7.872e-06	14	389
30	HP:0010977	Abnormal phagocytosis	4.756e-09	3.052e-07	2.484e-06	9.155e-06	7	47
31	HP:0100280	Crohn's disease	4.936e-09	3.065e-07	2.495e-06	9.502e-06	9	110
32	HP:0002091	Restrictive ventilatory defect	5.494e-09	3.305e-07	2.69e-06	1.058e-05	10	154
33	HP:0005479	Decreased circulating IgE	6.447e-09	3.761e-07	3.061e-06	1.241e-05	7	49
34	HP:0004370	Abnormality of temperature regulation	6.676e-09	3.78e-07	3.077e-06	1.285e-05	16	572
35	HP:0001945	Fever	7.064e-09	3.885e-07	3.162e-06	1.36e-05	15	486
36	HP:0005523	Lymphoproliferative disorder	7.507e-09	4.014e-07	3.268e-06	1.445e-05	10	159
37	HP:0005435	Impaired T cell function	8.347e-09	4.343e-07	3.535e-06	1.607e-05	8	80
38	HP:0002250	Abnormal large intestine morphology	9.073e-09	4.596e-07	3.741e-06	1.747e-05	16	584
39	HP:0003139	Panhypogammaglobulinemia	9.928e-09	4.901e-07	3.989e-06	1.911e-05	7	52
40	HP:0002716	Lymphadenopathy	1.028e-08	4.948e-07	4.027e-06	1.979e-05	12	276
41	HP:0002665	Lymphoma	1.105e-08	5.19e-07	4.225e-06	2.128e-05	13	345
42	HP:0005365	Severe B lymphocytopenia	1.14e-08	5.223e-07	4.252e-06	2.194e-05	7	53
43	HP:0002733	Abnormality of the lymph nodes	1.423e-08	6.37e-07	5.185e-06	2.739e-05	12	284
44	HP:0002873	Recurrent upper and lower respiratory tract infections	1.489e-08	6.37e-07	5.185e-06	2.867e-05	7	55
45	HP:0005425	Recurrent sinopulmonary infections	1.489e-08	6.37e-07	5.185e-06	2.867e-05	7	55
46	HP:0004432	Agammaglobulinemia	1.64e-08	6.777e-07	5.517e-06	3.158e-05	8	87
47	HP:0001890	Autoimmune hemolytic anemia	1.655e-08	6.777e-07	5.517e-06	3.185e-05	9	126
48	HP:0100326	Immunologic hypersensitivity	1.734e-08	6.956e-07	5.662e-06	3.339e-05	12	289
49	HP:0002829	Arthralgia	2.042e-08	8.023e-07	6.531e-06	3.931e-05	11	231
50	HP:0003493	Antinuclear antibody positivity	2.182e-08	8.399e-07	6.837e-06	4.2e-05	7	58

## Sheet: Disease
RANK	ID	Name	Source	pValue	FDR B&H	FDR B&Y	Bonferroni	Genes from Input	Genes in Annotation
1	C0010346	Crohn Disease	DisGeNET BeFree	1.468e-16	3.106e-13	2.558e-12	3.106e-13	24	1180
2	C0021390	Inflammatory Bowel Diseases	DisGeNET BeFree	9.931e-16	5.603e-13	4.614e-12	2.101e-12	25	1437
3	C0156147	Crohn's disease of large bowel	DisGeNET Curated	1.589e-15	5.603e-13	4.614e-12	3.362e-12	9	44
4	C0949272	IIeocolitis	DisGeNET Curated	1.589e-15	5.603e-13	4.614e-12	3.362e-12	9	44
5	C0267380	Crohn's disease of the ileum	DisGeNET Curated	1.589e-15	5.603e-13	4.614e-12	3.362e-12	9	44
6	C0678202	Regional enteritis	DisGeNET Curated	1.589e-15	5.603e-13	4.614e-12	3.362e-12	9	44
7	C0010346	Crohn Disease	DisGeNET Curated	5.551e-15	1.678e-12	1.382e-11	1.175e-11	9	50
8	20081125:Barrett	Crohn's disease	GWAS	8.221e-14	2.175e-11	1.791e-10	1.74e-10	7	22
9	C0004364	Autoimmune Diseases	DisGeNET BeFree	3.743e-13	8.8e-11	7.246e-10	7.92e-10	24	1679
10	20081125:WTCCC	Hypertension	GWAS	4.239e-13	8.971e-11	7.387e-10	8.971e-10	7	27
11	C0021390	Inflammatory Bowel Diseases	DisGeNET Curated	3.161e-12	6.08e-10	5.007e-09	6.688e-09	7	35
12	C0009324	Ulcerative Colitis	DisGeNET Curated	2.462e-10	4.342e-08	3.576e-07	5.21e-07	7	63
13	C0009324	Ulcerative Colitis	DisGeNET BeFree	1.192e-09	1.94e-07	1.598e-06	2.522e-06	18	1277
14	C0038013	Ankylosing spondylitis	DisGeNET BeFree	1.663e-09	2.514e-07	2.07e-06	3.52e-06	13	577
15	C0033860	Psoriasis	DisGeNET BeFree	8.968e-09	1.265e-06	1.042e-05	1.898e-05	16	1105
16	20081125:Rioux	Crohn's disease	GWAS	1.628e-08	2.153e-06	1.773e-05	3.444e-05	3	3
17	C1290884	Inflammatory disorder	DisGeNET BeFree	5.061e-08	6.299e-06	5.187e-05	0.0001071	10	391
18	C0009373	Colonic Diseases	DisGeNET BeFree	7.017e-08	8.249e-06	6.793e-05	0.0001485	4	16
19	C0949690	Spondylarthritis	DisGeNET BeFree	1.265e-07	1.409e-05	0.000116	0.0002677	7	153
20	C0004096	Asthma	DisGeNET BeFree	1.371e-07	1.45e-05	0.0001194	0.00029	18	1731
21	C0026769	Multiple Sclerosis	DisGeNET BeFree	2.531e-07	2.55e-05	0.00021	0.0005355	17	1599
22	C0039483	Giant Cell Arteritis	DisGeNET BeFree	2.967e-07	2.853e-05	0.000235	0.0006277	8	258
23	152700	SYSTEMIC LUPUS ERYTHEMATOSUS	OMIM MedGen	3.23e-07	2.971e-05	0.0002447	0.0006834	3	6
24	C0242380	Libman-Sacks Disease	DisGeNET Curated	3.878e-07	3.419e-05	0.0002816	0.0008206	5	58
25	C0036202	Sarcoidosis	DisGeNET BeFree	4.072e-07	3.446e-05	0.0002838	0.0008615	9	372
26	C0036690	Septicemia	DisGeNET BeFree	4.619e-07	3.759e-05	0.0003095	0.0009774	15	1279
27	C0024141	Lupus Erythematosus, Systemic	DisGeNET BeFree	5.38e-07	4.216e-05	0.0003472	0.001138	17	1686
28	C0243026	Sepsis	DisGeNET BeFree	8.36e-07	6.317e-05	0.0005202	0.001769	15	1340
29	C0024141	Lupus Erythematosus, Systemic	DisGeNET Curated	1.074e-06	7.789e-05	0.0006414	0.002274	5	71
30	C0018213	Graves Disease	DisGeNET BeFree	1.115e-06	7.789e-05	0.0006414	0.00236	10	547
31	C0007570	Celiac Disease	DisGeNET BeFree	1.141e-06	7.789e-05	0.0006414	0.002415	9	421
32	C0341395	Perianal Crohn's disease	DisGeNET BeFree	1.924e-06	0.0001272	0.001047	0.004071	3	10
33	cv:C0024141	Systemic lupus erythematosus	Clinical Variations	2.64e-06	0.0001642	0.001352	0.005587	3	11
34	C0042769	Virus Diseases	DisGeNET BeFree	2.649e-06	0.0001642	0.001352	0.005606	15	1469
35	C0004623	Bacterial Infections	DisGeNET BeFree	2.716e-06	0.0001642	0.001352	0.005747	10	604
36	C0009319	Colitis	DisGeNET BeFree	2.811e-06	0.0001652	0.00136	0.005948	13	1094
37	C0004943	Behcet Syndrome	DisGeNET BeFree	3.35e-06	0.0001916	0.001578	0.007089	9	480
38	C0238065	Secondary Biliary Cholangitis	DisGeNET Curated	4.107e-06	0.0002173	0.001789	0.008691	4	42
39	C0023892	Biliary cirrhosis	DisGeNET Curated	4.107e-06	0.0002173	0.001789	0.008691	4	42
40	C4551595	Biliary Cirrhosis, Primary, 1	DisGeNET Curated	4.107e-06	0.0002173	0.001789	0.008691	4	42
41	C0018553	Hamartoma Syndrome, Multiple	DisGeNET BeFree	5.431e-06	0.0002803	0.002308	0.01149	7	268
42	C0014060	Encephalitis, St. Louis	DisGeNET BeFree	5.985e-06	0.0002892	0.002382	0.01266	7	272
43	C0008312	Primary biliary cirrhosis	DisGeNET Curated	6.483e-06	0.0002892	0.002382	0.01372	4	47
44	20081125:Raelson	Crohn's disease	GWAS	6.561e-06	0.0002892	0.002382	0.01388	2	2
45	C1610637	Granulomatous infection	DisGeNET BeFree	6.561e-06	0.0002892	0.002382	0.01388	2	2
46	20081125:Libioulle	Crohn's disease	GWAS	6.561e-06	0.0002892	0.002382	0.01388	2	2
47	20081125:Duerr	Inflammatory bowel disease	GWAS	6.561e-06	0.0002892	0.002382	0.01388	2	2
48	C0920163	Idiopathic thrombocytopenia	DisGeNET BeFree	6.561e-06	0.0002892	0.002382	0.01388	2	2
49	C0024131	Lupus Vulgaris	DisGeNET BeFree	6.924e-06	0.000299	0.002462	0.01465	9	525
50	C2712971	Enteritis due to Norovirus	DisGeNET BeFree	8.88e-06	0.0003684	0.003034	0.01879	3	16
